# Supplementary material
Source: publisher figshare collection journal article supplement (https://acs.figshare.com/ndownloader/files/9282295)
Supplement: Supplementary file 1 [file 9282295]

## Supporting Information

# Enhanced Photovoltaic Performance of Tetrazine-Based Small Molecules with Conjugated Side Chain

*Chen Wang, Chang Li, Shanpeng Wen,\* Pengfei Ma, Ge Wang, Changhao Wang, Huayang Li, Liang Shen, Wenbin Guo and Shengping Ruan*

### Methods:

The thermal stability of two synthesized SMs is investigated by thermogravimetric analysis (TGA). The TGA was performed on a Perkin Elmer Pyris 1 analyzer under a nitrogen atmosphere ( $100 \text{ mL min}^{-1}$ ) at a heating rate of  $10 \text{ }^{\circ}\text{C min}^{-1}$ . The temperatures with 5% loss for TBDT(TTzT)<sub>2</sub> and TBDT(TTz2T)<sub>2</sub> are  $315 \text{ }^{\circ}\text{C}$  and  $320 \text{ }^{\circ}\text{C}$ , respectively.

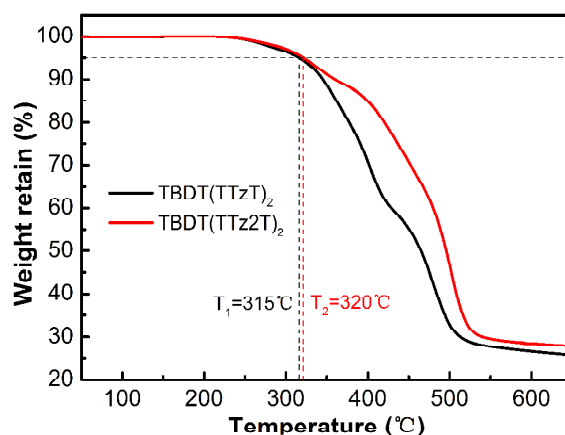

**Figure S1.** TGA plots of TBDT(TTzT)<sub>2</sub> and TBDT(TTz2T)<sub>2</sub> small molecules.

Transmission electron microscopy (TEM) test was carried out towards four SM:PC<sub>71</sub>BM blend films to investigate the morphology across the active layers. TEM was conducted using a Hitachi H-800 electron microscope at an acceleration voltage of 200 kV with a CCD camera.

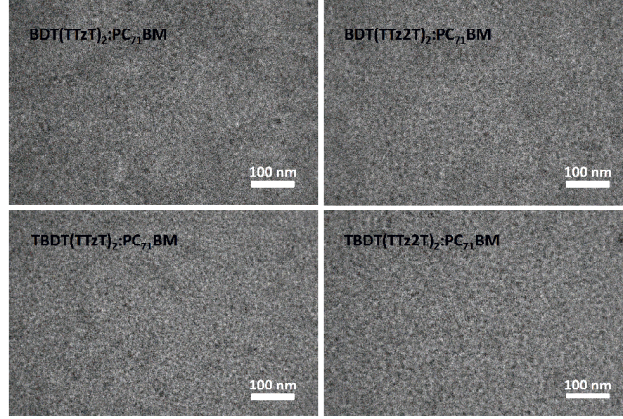

**Figure S2.** TEM images of blend film morphology of four SMs.

In this work, hole mobilities ( $\mu_h$ ) are determined using space-charge-limited-current (SCLC) method, with a hole only device structure of ITO/PEDOT:PSS/Sample films/Au. Sample films include pure SM films and SM:PC<sub>71</sub>BM blend films. The dark  $J$ - $V$  curves were recorded and fitted to a space charge limited form, where the SCLC is described by the Equation of

$$J = \frac{9}{8} \epsilon_0 \epsilon_r \mu_h \frac{(V - V_{bi} - V_r)^2}{L^3}.$$

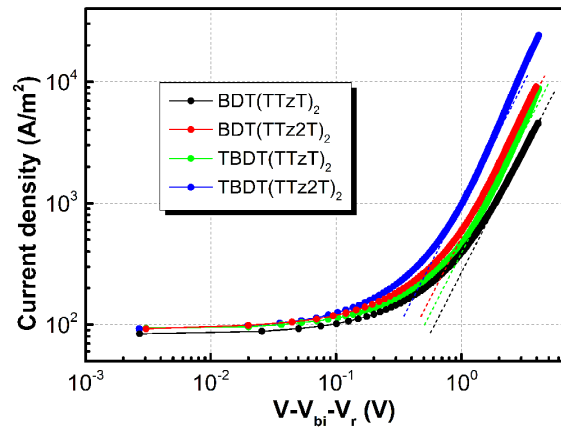

**Figure S3.** *J*-*V* characteristics of the hole-only device based on pure SM films.

**Table S1.** The derived  $\mu_h$  values of four small molecules in pure films.

|                               | BDT(TTzT) <sub>2</sub> | BDT(TTz2T) <sub>2</sub> | TBDT(TTzT) <sub>2</sub> | TBDT(TTz2T) <sub>2</sub> |
|-------------------------------|------------------------|-------------------------|-------------------------|--------------------------|
| $\mu_h$ (cm <sup>2</sup> /Vs) | $1.28 \times 10^{-4}$  | $2.54 \times 10^{-4}$   | $1.65 \times 10^{-4}$   | $5.01 \times 10^{-4}$    |

**Table S2.** The dihedral angles of four SMs determined through DFT calculations.

| Small molecule           | Structure | $\theta_1$<br>(°) | $\theta_2$<br>(°) | HOMO orbital | LUMO orbital |
|--------------------------|-----------|-------------------|-------------------|--------------|--------------|
| BDT(TTzT) <sub>2</sub>   |           | 2.8               | -                 |              |              |
| BDT(TTz2T) <sub>2</sub>  |           | 5.1               | -                 |              |              |
| TBDT(TTzT) <sub>2</sub>  |           | 4.6               | 56.8              |              |              |
| TBDT(TTz2T) <sub>2</sub> |           | 6.9               | 57.0              |              |              |

**Table S3.** Photovoltaic parameters based on different photoactive layer and D/A weight ratio under similar film thickness.

| Photoactive layer                                     | Weight ratio | Film thickness (nm) | $V_{oc}$ (V) | $J_{sc}$ (mAcm <sup>-2</sup> ) | FF(%) | PCE (%) |
|-------------------------------------------------------|--------------|---------------------|--------------|--------------------------------|-------|---------|
| <b>TBDT(TTzT)<sub>2</sub>:<br/>PC<sub>71</sub>BM</b>  | 2:1          | 70                  | 1.00         | 4.83                           | 47.0  | 2.27    |
|                                                       | 1.5:1        | 75                  | 1.03         | 5.10                           | 52.0  | 2.73    |
|                                                       | 1:1          | 73                  | 1.01         | 4.62                           | 50.7  | 2.34    |
|                                                       | 1:1.5        | 78                  | 1.01         | 4.21                           | 43.4  | 1.85    |
| <b>TBDT(TTz2T)<sub>2</sub>:<br/>PC<sub>71</sub>BM</b> | 2:1          | 76                  | 0.89         | 5.02                           | 46.1  | 2.06    |
|                                                       | 1.5:1        | 79                  | 0.93         | 5.41                           | 51.6  | 2.60    |
|                                                       | 1:1          | 81                  | 0.96         | 6.10                           | 53.1  | 3.11    |
|                                                       | 1:1.5        | 80                  | 0.95         | 5.78                           | 49.4  | 2.71    |
